# Supplementary material
Source: Springer Nature journal article supplement (https://www.springermedizin.de/resource/supplementary/12936_2012_2780_MOESM4_ESM.pdf/9544528)
Supplement: MOESM4 [file 9544528]

1

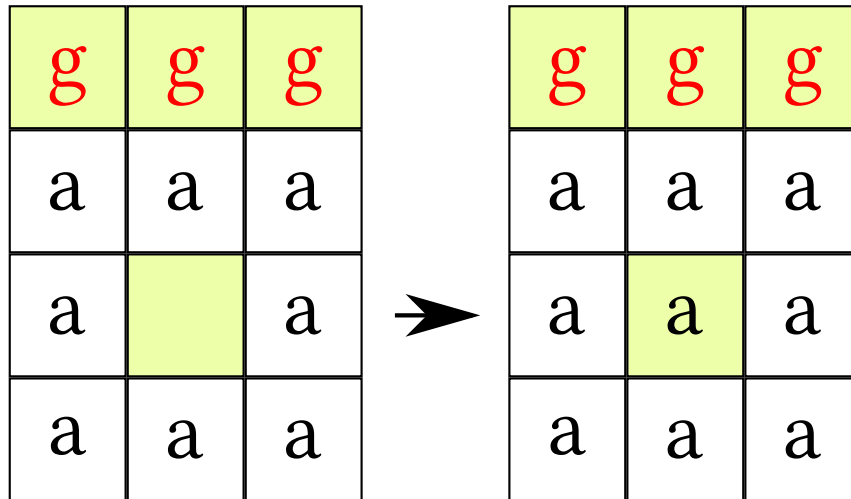

2

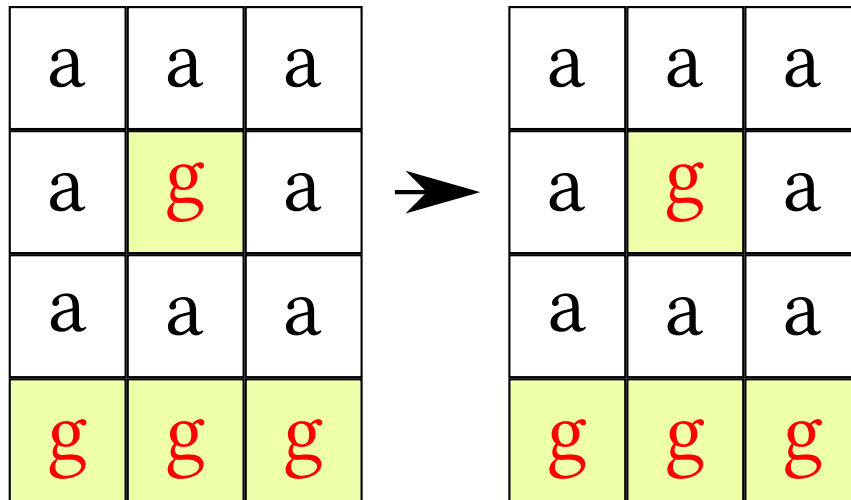

### Why initial conditions and not competition?

The green areas indicate grid cells which are more suitable for *An. gambiae* s.s., red **g** indicate *An. gambiae*, while black **a**, indicate *An. arabiensis*.

In example 1 we initialise the model as shown to the left. After some time, *An. arabiensis* has occupied the cell which is most suitable for *An. gambiae* s.s; *An. gambiae* s.s. is not able to pass the "wall" of *An. arabiensis*, and thus can not occupy this area.

In example 2, we initialise the model with *An. gambiae* s.s. in the suitable center area. In this case, *An. arabiensis* is not able to outcompete *An. gambiae* s.s. in this location.

Depending on the initial conditions, this cell can either have *An. gambiae* s.s., or *An. arabiensis* (or both). Competition does indeed play a role, but in this case the initial conditions are more important.
